# Supplementary material
Source: Springer Nature journal article supplement (https://www.springermedizin.de/resource/supplementary/12967_2013_1583_MOESM5_ESM.pdf/9574388)

**a**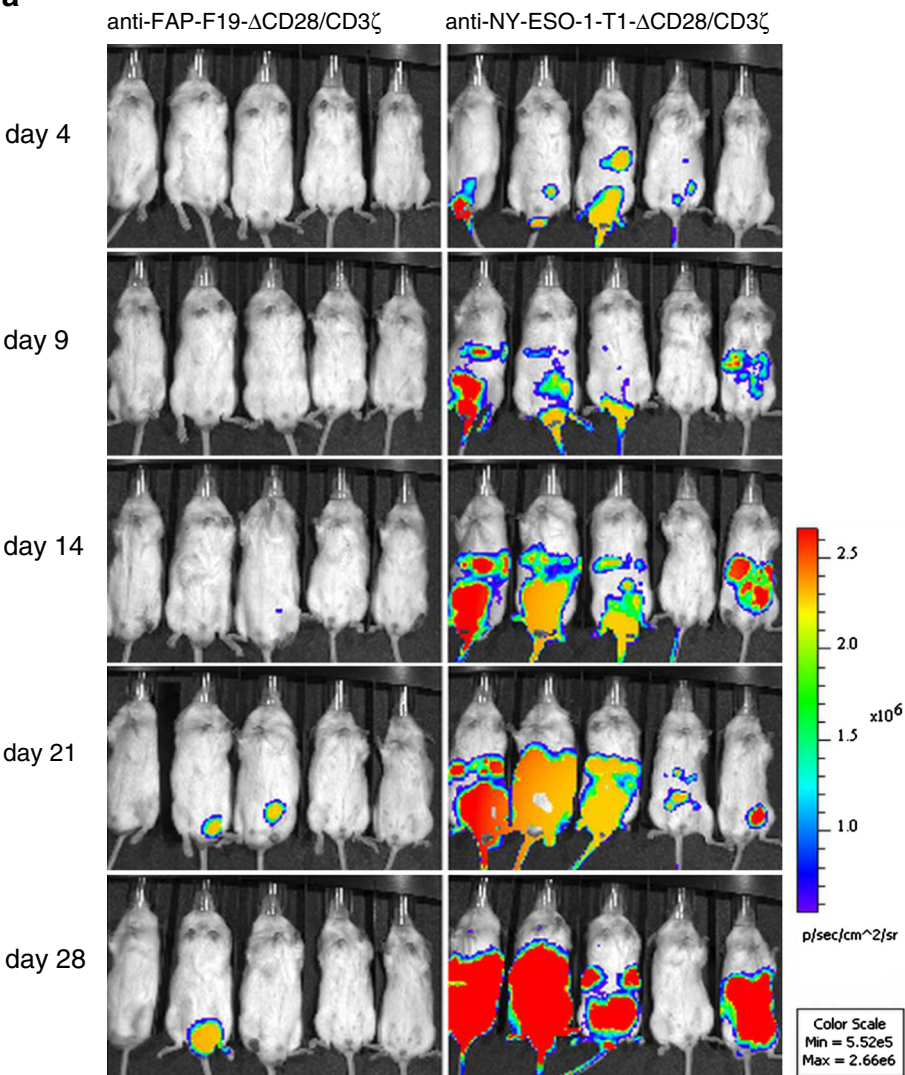**b**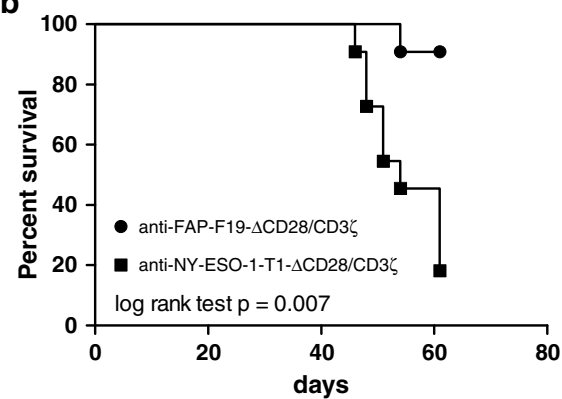

Supplement: MOESM5 [file 9574388]
